# Supplementary material for: Bouillonamide: A Mixed Polyketide–Peptide Cytotoxin from the Marine Cyanobacterium Moorea bouillonii
Source: MDPI journal article supplement (doi:10.3390/md11083015), 2013-08-19
Supplement: s1 [file s1]

marinedrugs-11-03015-s001.mol
  corina  04141404053D 1   1.00000     0.00000 
CORINA 3.49 0023  12.04.2013
 59 61  0  0  0  0  0  0  0  0999 V2000
   -4.8713   -0.1369   -0.6497 C   0  0  0  0  0  0  0  0  0  0  0  0
   -4.3519   -1.4155   -0.7284 C   0  0  0  0  0  0  0  0  0  0  0  0
   -3.4713   -1.8646    0.2378 C   0  0  0  0  0  0  0  0  0  0  0  0
   -3.1097   -1.0349    1.2827 C   0  0  0  0  0  0  0  0  0  0  0  0
   -3.6283    0.2441    1.3610 C   0  0  0  0  0  0  0  0  0  0  0  0
   -4.5100    0.6927    0.3955 C   0  0  0  0  0  0  0  0  0  0  0  0
   -2.9059   -3.2589    0.1525 C   0  0  0  0  0  0  0  0  0  0  0  0
   -1.6067   -3.2338   -0.6551 C   0  0  0  0  0  0  0  0  0  0  0  0
   -0.9791   -4.6035   -0.6361 C   0  0  0  0  0  0  0  0  0  0  0  0
   -1.3228   -5.4541   -1.4293 O   0  0  0  0  0  0  0  0  0  0  0  0
   -1.8989   -2.8386   -2.0342 N   0  0  0  0  0  0  0  0  0  0  0  0
   -1.0991   -1.7932   -2.6774 C   0  0  0  0  0  0  0  0  0  0  0  0
    0.5540   -3.8208    1.1509 C   0  0  0  0  0  0  0  0  0  0  0  0
   -0.0133   -4.8657    0.2949 N   0  0  0  0  0  0  0  0  0  0  0  0
   -2.8992   -3.4316   -2.7153 C   0  0  0  0  0  0  0  0  0  0  0  0
   -3.2501   -2.9534   -4.1015 C   0  0  0  0  0  0  0  0  0  0  0  0
   -3.1443   -4.0843   -5.0445 N   0  0  0  0  0  0  0  0  0  0  0  0
   -1.9135   -2.7844   -6.3795 O   0  0  0  0  0  0  0  0  0  0  0  0
   -2.4332   -3.8626   -6.1837 C   0  0  0  0  0  0  0  0  0  0  0  0
   -2.2960   -4.9669   -7.1994 C   0  0  0  0  0  0  0  0  0  0  0  0
   -2.0328   -4.3570   -8.5790 C   0  0  0  0  0  0  0  0  0  0  0  0
   -1.4957   -5.4372   -9.5197 C   0  0  0  0  0  0  0  0  0  0  0  0
    0.0034   -5.5203   -9.3874 C   0  0  0  0  0  0  0  0  0  0  0  0
    0.5712   -6.6534   -9.0290 C   0  0  0  0  0  0  0  0  0  0  0  0
    1.9707   -6.7181   -8.9089 N   0  0  0  0  0  0  0  0  0  0  0  0
    2.8356   -5.5715   -9.1975 C   0  0  0  0  0  0  0  0  0  0  0  0
    2.4675   -7.9239   -8.5040 C   0  0  0  0  0  0  0  0  0  0  0  0
    3.9580   -8.0774   -8.3413 C   0  0  0  0  0  0  0  0  0  0  0  0
    4.2486   -8.9493   -7.1177 C   0  0  0  0  0  0  0  0  0  0  0  0
    5.7160   -9.3823   -7.1373 C   0  0  0  0  0  0  0  0  0  0  0  0
    2.3167   -5.4484   -0.7651 O   0  0  0  0  0  0  0  0  0  0  0  0
    1.7500   -6.4214   -0.3143 C   0  0  0  0  0  0  0  0  0  0  0  0
    0.4193   -6.2792    0.3784 C   0  0  0  0  0  0  0  0  0  0  0  0
    2.5371   -9.3282   -2.4929 O   0  0  0  0  0  0  0  0  0  0  0  0
    3.4277   -8.5170   -2.3990 C   0  0  0  0  0  0  0  0  0  0  0  0
    3.6072   -7.7404   -1.1201 C   0  0  0  0  0  0  0  0  0  0  0  0
    2.3060   -7.6588   -0.4266 N   0  0  0  0  0  0  0  0  0  0  0  0
    4.2577   -8.3080   -3.4307 O   0  0  0  0  0  0  0  0  0  0  0  0
    4.0228   -9.0870   -4.6333 C   0  0  0  0  0  0  0  0  0  0  0  0
    2.6929   -9.8328   -4.5065 C   0  0  0  0  0  0  0  0  0  0  0  0
   -1.1276   -5.8753   -6.8114 C   0  0  0  0  0  0  0  0  0  0  0  0
    1.7228   -8.8547   -8.2798 O   0  0  0  0  0  0  0  0  0  0  0  0
    3.9698   -8.1506   -5.8428 C   0  0  0  0  0  0  0  0  0  0  0  0
    1.5459   -8.8224   -4.4401 C   0  0  0  0  0  0  0  0  0  0  0  0
    4.6207   -8.4552   -0.2241 C   0  0  0  0  0  0  0  0  0  0  0  0
    4.8906   -7.6157    0.9980 C   0  0  0  0  0  0  0  0  0  0  0  0
    4.1192   -7.7796    2.1333 C   0  0  0  0  0  0  0  0  0  0  0  0
    4.3667   -7.0095    3.2543 C   0  0  0  0  0  0  0  0  0  0  0  0
    5.3860   -6.0759    3.2401 C   0  0  0  0  0  0  0  0  0  0  0  0
    6.1581   -5.9126    2.1051 C   0  0  0  0  0  0  0  0  0  0  0  0
    5.9133   -6.6857    0.9856 C   0  0  0  0  0  0  0  0  0  0  0  0
    1.6465   -8.8500    0.1139 C   0  0  0  0  0  0  0  0  0  0  0  0
   -0.6147   -7.1734   -0.3088 C   0  0  0  0  0  0  0  0  0  0  0  0
   -0.1290   -8.5166   -0.3523 O   0  0  0  0  0  0  0  0  0  0  0  0
   -1.9275   -7.1309    0.4759 C   0  0  0  0  0  0  0  0  0  0  0  0
   -3.5155   -4.3482   -2.2145 O   0  0  0  0  0  0  0  0  0  0  0  0
   -4.6816   -2.4134   -4.1090 C   0  0  0  0  0  0  0  0  0  0  0  0
   -5.0364   -1.9285   -5.5161 C   0  0  0  0  0  0  0  0  0  0  0  0
   -5.6481   -3.5244   -3.6936 C   0  0  0  0  0  0  0  0  0  0  0  0
  1  2  2  0      
  2  3  1  0      
  3  4  2  0      
  4  5  1  0      
  5  6  2  0      
  6  1  1  0      
  3  7  1  0      
  8  9  1  0      
  9 10  2  0      
  8 11  1  0      
 11 12  1  0      
 13 14  1  0      
 14  9  1  0      
 11 15  1  0      
 15 16  1  0      
 16 17  1  0      
 18 19  2  0      
 19 17  1  0      
 19 20  1  0      
 20 21  1  0      
 21 22  1  0      
 22 23  1  0      
 23 24  2  0      
 24 25  1  0      
 25 26  1  0      
 25 27  1  0      
 27 28  1  0      
 28 29  1  0      
 29 30  1  0      
 31 32  2  0      
 32 33  1  0      
 34 35  2  0      
 35 36  1  0      
 36 37  1  0      
 37 32  1  0      
 38 39  1  0      
 39 40  1  0      
 20 41  1  0      
 27 42  2  0      
 35 38  1  0      
 29 43  1  0      
 43 39  1  0      
 40 44  1  0      
 36 45  1  0      
 45 46  1  0      
 46 47  2  0      
 47 48  1  0      
 48 49  2  0      
 49 50  1  0      
 50 51  2  0      
 51 46  1  0      
 37 52  1  0      
 33 53  1  0      
 53 54  1  0      
 53 55  1  0      
 15 56  2  0      
 33 14  1  0      
 16 57  1  0      
 57 58  1  0      
 57 59  1  0      
  8  7  1  0      
M  END
$$$$
