# Supplementary material for: Bouillonamide: A Mixed Polyketide–Peptide Cytotoxin from the Marine Cyanobacterium Moorea bouillonii
Source: MDPI journal article supplement (doi:10.3390/md11083015), 2013-08-19
Supplement: s2 [file s2]

marinedrugs-11-03015-s001.mol
  ChemDraw12271311592D

 59 61  0  0  0  0  0  0  0  0999 V2000
   -3.5724    3.3000    0.0000 C   0  0  0  0  0  0  0  0  0  0  0  0
   -3.5724    2.4750    0.0000 C   0  0  0  0  0  0  0  0  0  0  0  0
   -2.8579    2.0625    0.0000 C   0  0  0  0  0  0  0  0  0  0  0  0
   -2.1434    2.4750    0.0000 C   0  0  0  0  0  0  0  0  0  0  0  0
   -2.1434    3.3000    0.0000 C   0  0  0  0  0  0  0  0  0  0  0  0
   -2.8579    3.7125    0.0000 C   0  0  0  0  0  0  0  0  0  0  0  0
   -2.8579    1.2375    0.0000 C   0  0  0  0  0  0  0  0  0  0  0  0
   -2.1434    0.8250    0.0000 C   0  0  0  0  0  0  0  0  0  0  0  0
   -1.4289    1.2375    0.0000 C   0  0  0  0  0  0  0  0  0  0  0  0
   -1.4289    2.0625    0.0000 O   0  0  0  0  0  0  0  0  0  0  0  0
   -2.1434    0.0000    0.0000 N   0  0  0  0  0  0  0  0  0  0  0  0
   -1.4289   -0.4125    0.0000 C   0  0  0  0  0  0  0  0  0  0  0  0
   -0.7145    0.0000    0.0000 C   0  0  0  0  0  0  0  0  0  0  0  0
   -0.7145    0.8250    0.0000 N   0  0  0  0  0  0  0  0  0  0  0  0
   -2.8579   -0.4125    0.0000 C   0  0  0  0  0  0  0  0  0  0  0  0
   -2.8579   -1.2375    0.0000 C   0  0  0  0  0  0  0  0  0  0  0  0
   -2.1434   -1.6500    0.0000 N   0  0  0  0  0  0  0  0  0  0  0  0
   -2.8579   -2.8875    0.0000 O   0  0  0  0  0  0  0  0  0  0  0  0
   -2.1434   -2.4750    0.0000 C   0  0  0  0  0  0  0  0  0  0  0  0
   -1.4289   -2.8875    0.0000 C   0  0  0  0  0  0  0  0  0  0  0  0
   -0.7145   -2.4750    0.0000 C   0  0  0  0  0  0  0  0  0  0  0  0
   -0.0000   -2.8875    0.0000 C   0  0  0  0  0  0  0  0  0  0  0  0
    0.7145   -2.4750    0.0000 C   0  0  0  0  0  0  0  0  0  0  0  0
    1.4289   -2.8875    0.0000 C   0  0  0  0  0  0  0  0  0  0  0  0
    2.1434   -2.4750    0.0000 N   0  0  0  0  0  0  0  0  0  0  0  0
    2.1434   -1.6500    0.0000 C   0  0  0  0  0  0  0  0  0  0  0  0
    2.8579   -2.8875    0.0000 C   0  0  0  0  0  0  0  0  0  0  0  0
    3.5724   -2.4750    0.0000 C   0  0  0  0  0  0  0  0  0  0  0  0
    3.5724   -1.6500    0.0000 C   0  0  0  0  0  0  0  0  0  0  0  0
    2.8579   -1.2375    0.0000 C   0  0  0  0  0  0  0  0  0  0  0  0
    0.7145    0.0000    0.0000 O   0  0  0  0  0  0  0  0  0  0  0  0
    0.7145    0.8250    0.0000 C   0  0  0  0  0  0  0  0  0  0  0  0
   -0.0000    1.2375    0.0000 C   0  0  0  0  0  0  0  0  0  0  0  0
    1.4289   -0.4125    0.0000 O   0  0  0  0  0  0  0  0  0  0  0  0
    2.1434    0.0000    0.0000 C   0  0  0  0  0  0  0  0  0  0  0  0
    2.1434    0.8250    0.0000 C   0  0  0  0  0  0  0  0  0  0  0  0
    1.4289    1.2375    0.0000 N   0  0  0  0  0  0  0  0  0  0  0  0
    2.8579   -0.4125    0.0000 O   0  0  0  0  0  0  0  0  0  0  0  0
    3.5724    0.0000    0.0000 C   0  0  0  0  0  0  0  0  0  0  0  0
    3.5724    0.8250    0.0000 C   0  0  0  0  0  0  0  0  0  0  0  0
   -1.4289   -3.7125    0.0000 C   0  0  0  0  0  0  0  0  0  0  0  0
    2.8579   -3.7125    0.0000 O   0  0  0  0  0  0  0  0  0  0  0  0
    4.1557   -1.0666    0.0000 C   0  0  0  0  0  0  0  0  0  0  0  0
    4.2868    1.2375    0.0000 C   0  0  0  0  0  0  0  0  0  0  0  0
    2.8579    1.2375    0.0000 C   0  0  0  0  0  0  0  0  0  0  0  0
    2.8579    2.0625    0.0000 C   0  0  0  0  0  0  0  0  0  0  0  0
    3.5724    2.4750    0.0000 C   0  0  0  0  0  0  0  0  0  0  0  0
    3.5724    3.3000    0.0000 C   0  0  0  0  0  0  0  0  0  0  0  0
    2.8579    3.7125    0.0000 C   0  0  0  0  0  0  0  0  0  0  0  0
    2.1434    3.3000    0.0000 C   0  0  0  0  0  0  0  0  0  0  0  0
    2.1434    2.4750    0.0000 C   0  0  0  0  0  0  0  0  0  0  0  0
    1.4289    2.0625    0.0000 C   0  0  0  0  0  0  0  0  0  0  0  0
   -0.0000    2.0625    0.0000 C   0  0  0  0  0  0  0  0  0  0  0  0
   -0.7145    2.4750    0.0000 O   0  0  0  0  0  0  0  0  0  0  0  0
    0.7145    2.4750    0.0000 C   0  0  0  0  0  0  0  0  0  0  0  0
   -3.5724    0.0000    0.0000 O   0  0  0  0  0  0  0  0  0  0  0  0
   -3.5724   -1.6500    0.0000 C   0  0  0  0  0  0  0  0  0  0  0  0
   -3.5724   -2.4750    0.0000 C   0  0  0  0  0  0  0  0  0  0  0  0
   -4.2868   -1.2375    0.0000 C   0  0  0  0  0  0  0  0  0  0  0  0
  1  2  2  0      
  2  3  1  0      
  3  4  2  0      
  4  5  1  0      
  5  6  2  0      
  6  1  1  0      
  3  7  1  0      
  8  9  1  0      
  9 10  2  0      
  8 11  1  0      
 11 12  1  0      
 13 14  1  0      
 14  9  1  0      
 11 15  1  0      
 15 16  1  0      
 16 17  1  0      
 18 19  2  0      
 19 17  1  0      
 19 20  1  0      
 20 21  1  0      
 21 22  1  0      
 22 23  1  0      
 23 24  2  0      
 24 25  1  0      
 25 26  1  0      
 25 27  1  0      
 27 28  1  0      
 28 29  1  0      
 29 30  1  0      
 31 32  2  0      
 32 33  1  0      
 34 35  2  0      
 35 36  1  0      
 36 37  1  0      
 37 32  1  0      
 38 39  1  0      
 39 40  1  0      
 20 41  1  0      
 27 42  2  0      
 35 38  1  0      
 29 43  1  0      
 43 39  1  0      
 40 44  1  0      
 36 45  1  1      
 45 46  1  0      
 46 47  2  0      
 47 48  1  0      
 48 49  2  0      
 49 50  1  0      
 50 51  2  0      
 51 46  1  0      
 37 52  1  0      
 33 53  1  0      
 53 54  1  0      
 53 55  1  0      
 15 56  2  0      
 33 14  1  1      
 16 57  1  1      
 57 58  1  0      
 57 59  1  0      
  8  7  1  1      
M  END
