# Supplementary material for: Bouillonamide: A Mixed Polyketide–Peptide Cytotoxin from the Marine Cyanobacterium Moorea bouillonii
Source: MDPI journal article supplement (doi:10.3390/md11083015), 2013-08-19
Supplement: s3 [file s3]

marinedrugs-11-03015-s002.mol
  corina  04141404053D 1   1.00000     0.00000 
CORINA 3.49 0023  12.04.2013
 45 47  0  0  0  0  0  0  0  0999 V2000
    4.5332   -1.5787    0.7579 C   0  0  0  0  0  0  0  0  0  0  0  0
    3.2516   -1.4867    0.2479 C   0  0  0  0  0  0  0  0  0  0  0  0
    2.3139   -2.4543    0.5563 C   0  0  0  0  0  0  0  0  0  0  0  0
    2.6578   -3.5142    1.3745 C   0  0  0  0  0  0  0  0  0  0  0  0
    3.9396   -3.6067    1.8837 C   0  0  0  0  0  0  0  0  0  0  0  0
    4.8769   -2.6383    1.5764 C   0  0  0  0  0  0  0  0  0  0  0  0
    0.9165   -2.3535    0.0011 C   0  0  0  0  0  0  0  0  0  0  0  0
    0.9300   -2.7227   -1.4885 C   0  0  0  0  0  0  0  0  0  0  0  0
    1.1908   -4.2007   -1.6422 C   0  0  0  0  0  0  0  0  0  0  0  0
    0.2902   -4.9065   -2.0503 O   0  0  0  0  0  0  0  0  0  0  0  0
   -0.3938   -2.3843   -2.0629 N   0  0  0  0  0  0  0  0  0  0  0  0
   -1.2701   -1.4475   -1.3420 C   0  0  0  0  0  0  0  0  0  0  0  0
    3.6028   -3.8125   -1.2204 C   0  0  0  0  0  0  0  0  0  0  0  0
    2.4273   -4.6980   -1.3595 N   0  0  0  0  0  0  0  0  0  0  0  0
   -0.7245   -2.9288   -3.2574 C   0  0  0  0  0  0  0  0  0  0  0  0
   -2.1445   -2.9234   -3.7559 C   0  0  0  0  0  0  0  0  0  0  0  0
   -2.1737   -3.5426   -5.0730 O   0  0  0  0  0  0  0  0  0  0  0  0
   -1.7066   -1.6008   -6.0209 O   0  0  0  0  0  0  0  0  0  0  0  0
   -1.9623   -2.7742   -6.1474 C   0  0  0  0  0  0  0  0  0  0  0  0
    4.1430   -6.6151   -2.8747 O   0  0  0  0  0  0  0  0  0  0  0  0
    3.0106   -6.8054   -2.4531 C   0  0  0  0  0  0  0  0  0  0  0  0
    2.5991   -6.1531   -1.1667 C   0  0  0  0  0  0  0  0  0  0  0  0
    1.9219   -8.8691   -5.2432 C   0  0  0  0  0  0  0  0  0  0  0  0
    2.8641   -8.5161   -4.1265 C   0  0  0  0  0  0  0  0  0  0  0  0
    2.1891   -7.6388   -3.1454 N   0  0  0  0  0  0  0  0  0  0  0  0
    3.3282   -9.7972   -3.4273 C   0  0  0  0  0  0  0  0  0  0  0  0
    1.4042   -6.8308   -0.5217 C   0  0  0  0  0  0  0  0  0  0  0  0
    1.7578   -8.2824   -0.1920 C   0  0  0  0  0  0  0  0  0  0  0  0
    1.0319   -6.0916    0.7651 C   0  0  0  0  0  0  0  0  0  0  0  0
    0.1475   -3.4195   -3.9582 O   0  0  0  0  0  0  0  0  0  0  0  0
   -3.0365   -3.7465   -2.8222 C   0  0  0  0  0  0  0  0  0  0  0  0
    1.4103   -8.0356   -6.0834 N   0  0  0  0  0  0  0  0  0  0  0  0
    0.6175   -8.5259   -7.0162 C   0  0  0  0  0  0  0  0  0  0  0  0
    0.4403   -9.8485   -6.9541 C   0  0  0  0  0  0  0  0  0  0  0  0
    1.3752  -10.4565   -5.5882 S   0  0  0  0  0  0  0  0  0  0  0  0
   -0.0330   -7.6656   -8.0679 C   0  0  0  0  0  0  0  0  0  0  0  0
   -2.0515   -3.3811   -7.5266 C   0  0  0  0  0  0  0  0  0  0  0  0
   -2.5039   -4.8383   -7.4203 C   0  0  0  0  0  0  0  0  0  0  0  0
   -1.5252   -5.6942   -8.1289 N   0  0  0  0  0  0  0  0  0  0  0  0
   -1.0235   -6.7399   -7.4053 C   0  0  0  0  0  0  0  0  0  0  0  0
   -1.3620   -6.9243   -6.2561 O   0  0  0  0  0  0  0  0  0  0  0  0
   -3.0627   -2.5942   -8.3612 C   0  0  0  0  0  0  0  0  0  0  0  0
   -3.8822   -4.9924   -8.0687 C   0  0  0  0  0  0  0  0  0  0  0  0
   -4.3903   -6.4195   -7.8537 C   0  0  0  0  0  0  0  0  0  0  0  0
   -5.7677   -6.5734   -8.5017 C   0  0  0  0  0  0  0  0  0  0  0  0
  1  2  2  0      
  2  3  1  0      
  3  4  2  0      
  4  5  1  0      
  5  6  2  0      
  6  1  1  0      
  3  7  1  0      
  8  9  1  0      
  9 10  2  0      
  8 11  1  0      
 11 12  1  0      
 13 14  1  0      
 14  9  1  0      
 11 15  1  0      
 15 16  1  0      
 16 17  1  0      
 18 19  2  0      
 19 17  1  0      
 20 21  2  0      
 21 22  1  0      
 23 24  1  0      
 24 25  1  0      
 25 21  1  0      
 24 26  1  0      
 27 28  1  0      
 27 29  1  0      
 15 30  2  0      
 16 31  1  0      
  8  7  1  0      
 23 32  2  0      
 32 33  1  0      
 33 34  2  0      
 34 35  1  0      
 35 23  1  0      
 33 36  1  0      
 19 37  1  0      
 37 38  1  0      
 38 39  1  0      
 39 40  1  0      
 36 40  1  0      
 40 41  2  0      
 37 42  1  0      
 38 43  1  0      
 43 44  1  0      
 44 45  1  0      
 14 22  1  0      
 22 27  1  0      
M  END
$$$$
