# Supplementary material for: Bouillonamide: A Mixed Polyketide–Peptide Cytotoxin from the Marine Cyanobacterium Moorea bouillonii
Source: MDPI journal article supplement (doi:10.3390/md11083015), 2013-08-19
Supplement: s4 [file s4]

marinedrugs-11-03015-s002.mol
  ChemDraw12271312002D

 45 47  0  0  0  0  0  0  0  0999 V2000
   -3.2151    3.2005    0.0000 C   0  0  0  0  0  0  0  0  0  0  0  0
   -3.2151    2.3755    0.0000 C   0  0  0  0  0  0  0  0  0  0  0  0
   -2.5006    1.9630    0.0000 C   0  0  0  0  0  0  0  0  0  0  0  0
   -1.7862    2.3755    0.0000 C   0  0  0  0  0  0  0  0  0  0  0  0
   -1.7862    3.2005    0.0000 C   0  0  0  0  0  0  0  0  0  0  0  0
   -2.5006    3.6130    0.0000 C   0  0  0  0  0  0  0  0  0  0  0  0
   -2.5006    1.1380    0.0000 C   0  0  0  0  0  0  0  0  0  0  0  0
   -1.7862    0.7255    0.0000 C   0  0  0  0  0  0  0  0  0  0  0  0
   -1.0717    1.1380    0.0000 C   0  0  0  0  0  0  0  0  0  0  0  0
   -1.0717    1.9630    0.0000 O   0  0  0  0  0  0  0  0  0  0  0  0
   -1.7862   -0.0995    0.0000 N   0  0  0  0  0  0  0  0  0  0  0  0
   -1.0717   -0.5120    0.0000 C   0  0  0  0  0  0  0  0  0  0  0  0
   -0.3572   -0.0995    0.0000 C   0  0  0  0  0  0  0  0  0  0  0  0
   -0.3572    0.7255    0.0000 N   0  0  0  0  0  0  0  0  0  0  0  0
   -2.5006   -0.5120    0.0000 C   0  0  0  0  0  0  0  0  0  0  0  0
   -2.5006   -1.3370    0.0000 C   0  0  0  0  0  0  0  0  0  0  0  0
   -1.9115   -1.7525    0.0000 O   0  0  0  0  0  0  0  0  0  0  0  0
   -2.5006   -2.9870    0.0000 O   0  0  0  0  0  0  0  0  0  0  0  0
   -1.7862   -2.5745    0.0000 C   0  0  0  0  0  0  0  0  0  0  0  0
    1.0717   -0.0995    0.0000 O   0  0  0  0  0  0  0  0  0  0  0  0
    1.0717    0.7255    0.0000 C   0  0  0  0  0  0  0  0  0  0  0  0
    0.3572    1.1380    0.0000 C   0  0  0  0  0  0  0  0  0  0  0  0
    2.5006   -0.0995    0.0000 C   0  0  0  0  0  0  0  0  0  0  0  0
    2.5006    0.7255    0.0000 C   0  0  0  0  0  0  0  0  0  0  0  0
    1.7862    1.1380    0.0000 N   0  0  0  0  0  0  0  0  0  0  0  0
    3.2151    1.1380    0.0000 C   0  0  0  0  0  0  0  0  0  0  0  0
    0.3572    1.9630    0.0000 C   0  0  0  0  0  0  0  0  0  0  0  0
   -0.3572    2.3755    0.0000 C   0  0  0  0  0  0  0  0  0  0  0  0
    1.0717    2.3755    0.0000 C   0  0  0  0  0  0  0  0  0  0  0  0
   -3.2151   -0.0995    0.0000 O   0  0  0  0  0  0  0  0  0  0  0  0
   -3.2151   -1.7495    0.0000 C   0  0  0  0  0  0  0  0  0  0  0  0
    1.8332   -0.5844    0.0000 N   0  0  0  0  0  0  0  0  0  0  0  0
    2.0881   -1.3690    0.0000 C   0  0  0  0  0  0  0  0  0  0  0  0
    2.9131   -1.3690    0.0000 C   0  0  0  0  0  0  0  0  0  0  0  0
    3.1681   -0.5844    0.0000 S   0  0  0  0  0  0  0  0  0  0  0  0
    1.6756   -2.0835    0.0000 C   0  0  0  0  0  0  0  0  0  0  0  0
   -0.9893   -2.7880    0.0000 C   0  0  0  0  0  0  0  0  0  0  0  0
   -0.1924   -2.5745    0.0000 C   0  0  0  0  0  0  0  0  0  0  0  0
    0.6045   -2.7880    0.0000 N   0  0  0  0  0  0  0  0  0  0  0  0
    1.4014   -2.5745    0.0000 C   0  0  0  0  0  0  0  0  0  0  0  0
    2.1158   -2.9870    0.0000 O   0  0  0  0  0  0  0  0  0  0  0  0
   -0.9893   -3.6130    0.0000 C   0  0  0  0  0  0  0  0  0  0  0  0
   -0.1924   -1.7495    0.0000 C   0  0  0  0  0  0  0  0  0  0  0  0
   -0.9069   -1.3370    0.0000 C   0  0  0  0  0  0  0  0  0  0  0  0
   -1.6213   -1.7495    0.0000 C   0  0  0  0  0  0  0  0  0  0  0  0
  1  2  2  0      
  2  3  1  0      
  3  4  2  0      
  4  5  1  0      
  5  6  2  0      
  6  1  1  0      
  3  7  1  0      
  8  9  1  0      
  9 10  2  0      
  8 11  1  0      
 11 12  1  0      
 13 14  1  0      
 14  9  1  0      
 11 15  1  0      
 15 16  1  0      
 16 17  1  0      
 18 19  2  0      
 19 17  1  0      
 20 21  2  0      
 21 22  1  0      
 23 24  1  0      
 24 25  1  0      
 25 21  1  0      
 24 26  1  1      
 27 28  1  0      
 27 29  1  0      
 15 30  2  0      
 16 31  1  1      
  8  7  1  1      
 23 32  2  0      
 32 33  1  0      
 33 34  2  0      
 34 35  1  0      
 35 23  1  0      
 33 36  1  0      
 19 37  1  0      
 37 38  1  0      
 38 39  1  0      
 39 40  1  0      
 36 40  1  0      
 40 41  2  0      
 37 42  1  1      
 38 43  1  1      
 43 44  1  0      
 44 45  1  0      
 14 22  1  0      
 22 27  1  1      
M  END
