# Supplementary material for: Bouillonamide: A Mixed Polyketide–Peptide Cytotoxin from the Marine Cyanobacterium Moorea bouillonii
Source: MDPI journal article supplement (doi:10.3390/md11083015), 2013-08-19
Supplement: s5 [file s5]

marinedrugs-11-03015-s003.mol
  corina  04141404063D 1   1.00000     0.00000 
CORINA 3.49 0023  12.04.2013
 59 62  0  0  0  0  0  0  0  0999 V2000
    5.8419  -11.4939    3.3201 C   0  0  0  0  0  0  0  0  0  0  0  0
    4.8663  -11.7330    2.3717 C   0  0  0  0  0  0  0  0  0  0  0  0
    5.1129  -12.6079    1.3299 C   0  0  0  0  0  0  0  0  0  0  0  0
    6.3360  -13.2456    1.2344 C   0  0  0  0  0  0  0  0  0  0  0  0
    7.3147  -13.0103    2.1805 C   0  0  0  0  0  0  0  0  0  0  0  0
    7.0699  -12.1325    3.2265 C   0  0  0  0  0  0  0  0  0  0  0  0
    4.0466  -12.8672    0.2970 C   0  0  0  0  0  0  0  0  0  0  0  0
    4.1918  -11.8647   -0.8481 C   0  0  0  0  0  0  0  0  0  0  0  0
    3.9293  -10.4913   -0.3661 N   0  0  0  0  0  0  0  0  0  0  0  0
    3.2307  -12.1840   -1.9606 C   0  0  0  0  0  0  0  0  0  0  0  0
    2.2161  -11.5185   -2.0647 O   0  0  0  0  0  0  0  0  0  0  0  0
    1.8835  -11.0449    0.3925 O   0  0  0  0  0  0  0  0  0  0  0  0
    2.7117  -10.1903    0.1442 C   0  0  0  0  0  0  0  0  0  0  0  0
    3.4977  -13.1745   -2.8528 N   0  0  0  0  0  0  0  0  0  0  0  0
    2.4405  -13.4986   -3.8394 C   0  0  0  0  0  0  0  0  0  0  0  0
    2.1600  -12.3095   -4.6908 C   0  0  0  0  0  0  0  0  0  0  0  0
    1.1926  -12.2121   -5.6267 N   0  0  0  0  0  0  0  0  0  0  0  0
    1.6348  -11.9553   -7.0225 C   0  0  0  0  0  0  0  0  0  0  0  0
    1.1771  -10.5964   -7.4417 C   0  0  0  0  0  0  0  0  0  0  0  0
    0.7907  -10.2174   -8.6713 N   0  0  0  0  0  0  0  0  0  0  0  0
    0.5637   -8.8058   -9.0299 C   0  0  0  0  0  0  0  0  0  0  0  0
   -0.2670   -8.1088   -7.9857 C   0  0  0  0  0  0  0  0  0  0  0  0
    0.2469   -7.0753   -7.3047 O   0  0  0  0  0  0  0  0  0  0  0  0
   -0.6599   -6.1897   -6.5944 C   0  0  0  0  0  0  0  0  0  0  0  0
   -0.5758   -6.4454   -5.0930 C   0  0  0  0  0  0  0  0  0  0  0  0
    1.3925   -8.5294    1.2759 C   0  0  0  0  0  0  0  0  0  0  0  0
    2.3614   -8.7774    0.4097 C   0  0  0  0  0  0  0  0  0  0  0  0
    0.1535   -6.5624    0.5387 N   0  0  0  0  0  0  0  0  0  0  0  0
    0.8545   -7.1860    1.6392 C   0  0  0  0  0  0  0  0  0  0  0  0
    0.9242   -6.3142   -2.1373 O   0  0  0  0  0  0  0  0  0  0  0  0
   -0.0103   -5.2428   -2.2629 C   0  0  0  0  0  0  0  0  0  0  0  0
   -0.2356   -4.5840   -0.9039 C   0  0  0  0  0  0  0  0  0  0  0  0
    3.0832   -7.6863   -0.3315 C   0  0  0  0  0  0  0  0  0  0  0  0
    4.7654  -13.9122   -2.8703 C   0  0  0  0  0  0  0  0  0  0  0  0
    0.4429   -5.3720    0.1858 C   0  0  0  0  0  0  0  0  0  0  0  0
    1.7527   -4.7533    1.2036 S   0  0  0  0  0  0  0  0  0  0  0  0
    1.9305   -6.2584    2.2169 C   0  0  0  0  0  0  0  0  0  0  0  0
    0.3380   -3.1640   -0.9204 C   0  0  0  0  0  0  0  0  0  0  0  0
   -1.3369   -5.7740   -2.8028 C   0  0  0  0  0  0  0  0  0  0  0  0
   -1.4519   -5.4786   -4.3029 C   0  0  0  0  0  0  0  0  0  0  0  0
   -0.2523   -4.7446   -6.9061 C   0  0  0  0  0  0  0  0  0  0  0  0
    0.2585   -4.6580   -8.3457 C   0  0  0  0  0  0  0  0  0  0  0  0
   -1.4640   -3.8255   -6.7388 C   0  0  0  0  0  0  0  0  0  0  0  0
    0.8552   -4.3084   -5.9449 C   0  0  0  0  0  0  0  0  0  0  0  0
   -1.3950   -8.4855   -7.7645 O   0  0  0  0  0  0  0  0  0  0  0  0
    2.8738  -11.3138   -4.5380 O   0  0  0  0  0  0  0  0  0  0  0  0
    1.2101  -14.0261   -3.1103 C   0  0  0  0  0  0  0  0  0  0  0  0
   -0.2480  -12.3089   -5.3371 C   0  0  0  0  0  0  0  0  0  0  0  0
    1.0916  -13.0809   -7.8961 C   0  0  0  0  0  0  0  0  0  0  0  0
    1.1693   -9.7206   -6.5742 O   0  0  0  0  0  0  0  0  0  0  0  0
   -0.1661   -8.7688  -10.3797 C   0  0  0  0  0  0  0  0  0  0  0  0
    0.5245  -11.0468   -9.8444 C   0  0  0  0  0  0  0  0  0  0  0  0
    0.1043  -10.1426  -11.0128 C   0  0  0  0  0  0  0  0  0  0  0  0
   -0.4258  -13.1735   -7.7234 C   0  0  0  0  0  0  0  0  0  0  0  0
    1.7341  -14.4054   -7.4792 C   0  0  0  0  0  0  0  0  0  0  0  0
   -1.0051  -14.1015   -8.7930 C   0  0  0  0  0  0  0  0  0  0  0  0
   -2.9191   -5.6468   -4.7131 C   0  0  0  0  0  0  0  0  0  0  0  0
    8.0313  -11.8990    4.1582 O   0  0  0  0  0  0  0  0  0  0  0  0
    7.7095  -10.9834    5.2071 C   0  0  0  0  0  0  0  0  0  0  0  0
  1  2  2  0      
  2  3  1  0      
  3  4  2  0      
  4  5  1  0      
  5  6  2  0      
  6  1  1  0      
  3  7  1  0      
  8  9  1  0      
  8 10  1  0      
 10 11  2  0      
 12 13  2  0      
 13  9  1  0      
 10 14  1  0      
 14 15  1  0      
 15 16  1  0      
 17 16  1  0      
 17 18  1  0      
 18 19  1  0      
 19 20  1  0      
 21 22  1  0      
 22 23  1  0      
 23 24  1  0      
 24 25  1  0      
 26 27  2  0      
 28 29  1  0      
 29 26  1  0      
 31 32  1  0      
 27 33  1  0      
 14 34  1  0      
  8  7  1  0      
 27 13  1  0      
 28 35  2  0      
 35 36  1  0      
 36 37  1  0      
 35 32  1  0      
 32 38  1  0      
 31 30  1  0      
 31 39  1  0      
 39 40  1  0      
 40 25  1  0      
 24 41  1  0      
 41 42  1  0      
 41 43  1  0      
 41 44  1  0      
 22 45  2  0      
 16 46  2  0      
 15 47  1  0      
 17 48  1  0      
 19 50  2  0      
 20 21  1  0      
 21 51  1  0      
 20 52  1  0      
 52 53  1  0      
 51 53  1  0      
 49 54  1  0      
 49 55  1  0      
 54 56  1  0      
 40 57  1  0      
 29 37  1  0      
 18 49  1  0      
 58 59  1  0      
  6 58  1  0      
M  STY  1   1 SUP
M  SLB  1   1   1
M  SAL   1  2  58  59
M  SBL   1  1  62
M  SMT   1 OCH3
M  SBV   1 62   -7.1510    6.3496
M  END
$$$$
