# Supplementary material for: Bouillonamide: A Mixed Polyketide–Peptide Cytotoxin from the Marine Cyanobacterium Moorea bouillonii
Source: MDPI journal article supplement (doi:10.3390/md11083015), 2013-08-19
Supplement: s6 [file s6]

marinedrugs-11-03015-s003.mol
  ChemDraw04141415562D

 59 62  0  0  0  0  0  0  0  0999 V2000
   -4.2575    3.6088    0.0000 C   0  0  0  0  0  0  0  0  0  0  0  0
   -4.2575    2.7838    0.0000 C   0  0  0  0  0  0  0  0  0  0  0  0
   -3.5430    2.3713    0.0000 C   0  0  0  0  0  0  0  0  0  0  0  0
   -2.8285    2.7838    0.0000 C   0  0  0  0  0  0  0  0  0  0  0  0
   -2.8285    3.6088    0.0000 C   0  0  0  0  0  0  0  0  0  0  0  0
   -3.5430    4.0213    0.0000 C   0  0  0  0  0  0  0  0  0  0  0  0
   -3.5430    1.5463    0.0000 C   0  0  0  0  0  0  0  0  0  0  0  0
   -2.8285    1.1338    0.0000 C   0  0  0  0  0  0  0  0  0  0  0  0
   -2.1141    1.5463    0.0000 N   0  0  0  0  0  0  0  0  0  0  0  0
   -2.8285    0.3088    0.0000 C   0  0  0  0  0  0  0  0  0  0  0  0
   -2.1141   -0.1037    0.0000 O   0  0  0  0  0  0  0  0  0  0  0  0
   -1.3996    0.3088    0.0000 O   0  0  0  0  0  0  0  0  0  0  0  0
   -1.3996    1.1338    0.0000 C   0  0  0  0  0  0  0  0  0  0  0  0
   -3.5430   -0.1037    0.0000 N   0  0  0  0  0  0  0  0  0  0  0  0
   -3.5430   -0.9287    0.0000 C   0  0  0  0  0  0  0  0  0  0  0  0
   -2.8285   -1.3412    0.0000 C   0  0  0  0  0  0  0  0  0  0  0  0
   -2.8285   -2.1662    0.0000 N   0  0  0  0  0  0  0  0  0  0  0  0
   -2.1347   -2.5581    0.0000 C   0  0  0  0  0  0  0  0  0  0  0  0
   -1.3996   -2.1662    0.0000 C   0  0  0  0  0  0  0  0  0  0  0  0
   -0.4376   -2.5817    0.0000 N   0  0  0  0  0  0  0  0  0  0  0  0
    0.3461   -2.5817    0.0000 C   0  0  0  0  0  0  0  0  0  0  0  0
    1.2124   -2.1073    0.0000 C   0  0  0  0  0  0  0  0  0  0  0  0
    2.1405   -2.5198    0.0000 O   0  0  0  0  0  0  0  0  0  0  0  0
    2.8211   -2.0455    0.0000 C   0  0  0  0  0  0  0  0  0  0  0  0
    2.8872   -1.3412    0.0000 C   0  0  0  0  0  0  0  0  0  0  0  0
    0.0294    1.1338    0.0000 C   0  0  0  0  0  0  0  0  0  0  0  0
   -0.6851    1.5463    0.0000 C   0  0  0  0  0  0  0  0  0  0  0  0
    1.4583    1.1338    0.0000 N   0  0  0  0  0  0  0  0  0  0  0  0
    0.7438    1.5463    0.0000 C   0  0  0  0  0  0  0  0  0  0  0  0
    2.1728   -0.1037    0.0000 O   0  0  0  0  0  0  0  0  0  0  0  0
    2.8872    0.3088    0.0000 C   0  0  0  0  0  0  0  0  0  0  0  0
    2.8872    1.1338    0.0000 C   0  0  0  0  0  0  0  0  0  0  0  0
   -0.6851    2.3713    0.0000 C   0  0  0  0  0  0  0  0  0  0  0  0
   -4.2575    0.3088    0.0000 C   0  0  0  0  0  0  0  0  0  0  0  0
    2.1728    1.5463    0.0000 C   0  0  0  0  0  0  0  0  0  0  0  0
    2.1728    2.3713    0.0000 S   0  0  0  0  0  0  0  0  0  0  0  0
    1.1093    2.5539    0.0000 C   0  0  0  0  0  0  0  0  0  0  0  0
    3.6017    1.5463    0.0000 C   0  0  0  0  0  0  0  0  0  0  0  0
    3.4605   -0.2717    0.0000 C   0  0  0  0  0  0  0  0  0  0  0  0
    3.5430   -0.9730    0.0000 C   0  0  0  0  0  0  0  0  0  0  0  0
    3.2336   -2.7599    0.0000 C   0  0  0  0  0  0  0  0  0  0  0  0
    4.0586   -2.7599    0.0000 C   0  0  0  0  0  0  0  0  0  0  0  0
    3.0201   -3.5568    0.0000 C   0  0  0  0  0  0  0  0  0  0  0  0
    3.6461   -3.4744    0.0000 C   0  0  0  0  0  0  0  0  0  0  0  0
    1.2124   -1.2823    0.0000 O   0  0  0  0  0  0  0  0  0  0  0  0
   -2.1141   -0.9287    0.0000 O   0  0  0  0  0  0  0  0  0  0  0  0
   -4.2575   -1.3412    0.0000 C   0  0  0  0  0  0  0  0  0  0  0  0
   -3.5430   -2.5787    0.0000 C   0  0  0  0  0  0  0  0  0  0  0  0
   -2.1450   -3.3247    0.0000 C   0  0  0  0  0  0  0  0  0  0  0  0
   -1.3996   -1.3412    0.0000 O   0  0  0  0  0  0  0  0  0  0  0  0
    0.5524   -3.2417    0.0000 C   0  0  0  0  0  0  0  0  0  0  0  0
   -0.7837   -3.2834    0.0000 C   0  0  0  0  0  0  0  0  0  0  0  0
   -0.0619   -3.7784    0.0000 C   0  0  0  0  0  0  0  0  0  0  0  0
   -2.8285   -3.8162    0.0000 C   0  0  0  0  0  0  0  0  0  0  0  0
   -1.3996   -3.8162    0.0000 C   0  0  0  0  0  0  0  0  0  0  0  0
   -2.8285   -4.6412    0.0000 C   0  0  0  0  0  0  0  0  0  0  0  0
    4.2575   -1.3855    0.0000 C   0  0  0  0  0  0  0  0  0  0  0  0
   -3.1865    4.6412    0.0000 O   0  0  0  0  0  0  0  0  0  0  0  0
   -2.5970    4.3009    0.0000 C   0  0  0  0  0  0  0  0  0  0  0  0
  1  2  2  0      
  2  3  1  0      
  3  4  2  0      
  4  5  1  0      
  5  6  2  0      
  6  1  1  0      
  3  7  1  0      
  8  9  1  0      
  8 10  1  0      
 10 11  2  0      
 12 13  2  0      
 13  9  1  0      
 10 14  1  0      
 14 15  1  0      
 15 16  1  0      
 17 16  1  0      
 17 18  1  0      
 18 19  1  0      
 19 20  1  0      
 21 22  1  0      
 22 23  1  0      
 23 24  1  0      
 24 25  1  0      
 26 27  2  0      
 28 29  1  0      
 29 26  1  0      
 31 32  1  0      
 27 33  1  0      
 14 34  1  0      
  8  7  1  6      
 27 13  1  0      
 28 35  2  0      
 35 36  1  0      
 36 37  1  0      
 35 32  1  0      
 32 38  1  1      
 31 30  1  6      
 31 39  1  0      
 39 40  1  0      
 40 25  1  0      
 24 41  1  1      
 41 42  1  0      
 41 43  1  0      
 41 44  1  0      
 22 45  2  0      
 16 46  2  0      
 15 47  1  6      
 17 48  1  0      
 19 50  2  0      
 20 21  1  0      
 21 51  1  6      
 20 52  1  0      
 52 53  1  0      
 51 53  1  0      
 49 54  1  1      
 49 55  1  0      
 54 56  1  0      
 40 57  1  6      
 29 37  1  1      
 18 49  1  6      
 58 59  1  0      
  6 58  1  0      
M  STY  1   1 SUP
M  SLB  1   1   1
M  SAL   1  2  58  59
M  SBL   1  1  62
M  SMT   1 OCH3
M  SBV   1 62   -7.1510    6.3496
M  END
