# Supplementary material for: Bouillonamide: A Mixed Polyketide–Peptide Cytotoxin from the Marine Cyanobacterium Moorea bouillonii
Source: MDPI journal article supplement (doi:10.3390/md11083015), 2013-08-19
Supplement: s7 [file s7]

marinedrugs-11-03015-s004.mol
  corina  04141404063D 1   1.00000     0.00000 
CORINA 3.49 0023  12.04.2013
 43 45  0  0  0  0  0  0  0  0999 V2000
   -2.1940    1.3621   -0.0489 C   0  0  0  0  0  0  0  0  0  0  0  0
   -1.7147   -0.0686   -0.0272 C   0  0  0  0  0  0  0  0  0  0  0  0
   -1.1156   -0.5690    1.0531 O   0  0  0  0  0  0  0  0  0  0  0  0
   -0.0063    1.6815    0.9196 O   0  0  0  0  0  0  0  0  0  0  0  0
   -1.0359    2.3309    0.1823 C   0  0  0  0  0  0  0  0  0  0  0  0
    1.3582   -0.4732    3.0744 C   0  0  0  0  0  0  0  0  0  0  0  0
    1.8568    0.1787    1.7867 C   0  0  0  0  0  0  0  0  0  0  0  0
    2.1529    1.6606    1.9906 C   0  0  0  0  0  0  0  0  0  0  0  0
    1.0963    2.5092    1.2779 C   0  0  0  0  0  0  0  0  0  0  0  0
   -0.9837   -1.9864    1.2747 C   0  0  0  0  0  0  0  0  0  0  0  0
   -0.4075   -2.2800    2.6586 C   0  0  0  0  0  0  0  0  0  0  0  0
    1.0603   -1.9451    2.8144 C   0  0  0  0  0  0  0  0  0  0  0  0
   -2.3842   -2.6268    1.2056 C   0  0  0  0  0  0  0  0  0  0  0  0
   -3.2761   -2.0210    2.2911 C   0  0  0  0  0  0  0  0  0  0  0  0
   -4.6788   -2.5516    2.1428 C   0  0  0  0  0  0  0  0  0  0  0  0
   -5.2773   -3.1437    3.1708 C   0  0  0  0  0  0  0  0  0  0  0  0
   -6.6466   -3.6617    3.0260 C   0  0  0  0  0  0  0  0  0  0  0  0
   -7.2451   -4.2539    4.0539 C   0  0  0  0  0  0  0  0  0  0  0  0
   -8.6477   -4.7845    3.9056 C   0  0  0  0  0  0  0  0  0  0  0  0
   -8.6766   -6.2646    4.2919 C   0  0  0  0  0  0  0  0  0  0  0  0
    0.1652    0.2748    3.6528 C   0  0  0  0  0  0  0  0  0  0  0  0
    1.5960   -2.7105    3.9139 O   0  0  0  0  0  0  0  0  0  0  0  0
   -0.1142   -2.6321    0.1938 C   0  0  0  0  0  0  0  0  0  0  0  0
   -1.8860   -0.7300   -1.0299 O   0  0  0  0  0  0  0  0  0  0  0  0
   -1.5174    3.4525    0.9278 O   0  0  0  0  0  0  0  0  0  0  0  0
    0.7620    3.2958    1.9539 H   0  0  0  0  0  0  0  0  0  0  0  0
    1.7033    3.1364    0.0219 C   0  0  0  0  0  0  0  0  0  0  0  0
    1.0231    2.5884   -1.2281 C   0  0  0  0  0  0  0  0  0  0  0  0
   -0.4840    2.8174   -1.1601 C   0  0  0  0  0  0  0  0  0  0  0  0
    1.2971    1.1942   -1.3671 O   0  0  0  0  0  0  0  0  0  0  0  0
    1.3877   -0.7853   -4.1962 C   0  0  0  0  0  0  0  0  0  0  0  0
    1.1766    0.7298   -4.1352 C   0  0  0  0  0  0  0  0  0  0  0  0
    2.2884    1.3381   -3.4749 O   0  0  0  0  0  0  0  0  0  0  0  0
    2.4735    0.9058   -2.1255 C   0  0  0  0  0  0  0  0  0  0  0  0
    2.7367   -0.6022   -2.1058 C   0  0  0  0  0  0  0  0  0  0  0  0
    1.5638   -1.3261   -2.7740 C   0  0  0  0  0  0  0  0  0  0  0  0
    1.4218    3.1133   -2.1020 H   0  0  0  0  0  0  0  0  0  0  0  0
    1.0599    1.2863   -5.5556 C   0  0  0  0  0  0  0  0  0  0  0  0
    1.8345   -2.7283   -2.8258 O   0  0  0  0  0  0  0  0  0  0  0  0
    0.2509   -1.4017   -4.8042 O   0  0  0  0  0  0  0  0  0  0  0  0
    0.5676   -2.5397   -5.6085 C   0  0  0  0  0  0  0  0  0  0  0  0
    3.9419   -0.8859   -2.8192 O   0  0  0  0  0  0  0  0  0  0  0  0
    5.1168   -0.8674   -2.0060 C   0  0  0  0  0  0  0  0  0  0  0  0
  1  2  1  0      
  2  3  1  0      
  4  5  1  0      
  5  1  1  0      
  6  7  1  0      
  7  8  1  0      
  8  9  1  0      
  9  4  1  0      
 10 11  1  0      
 11 12  1  0      
 12  6  1  0      
 10 13  1  0      
 13 14  1  0      
 14 15  1  0      
 15 16  2  0      
 16 17  1  0      
 17 18  2  0      
 18 19  1  0      
 19 20  1  0      
  6 21  1  0      
 12 22  1  0      
 10 23  1  0      
  2 24  2  0      
  5 25  1  0      
  9 26  1  0      
  9 27  1  0      
 27 28  1  0      
 28 29  1  0      
 29  5  1  0      
 28 30  1  0      
 31 32  1  0      
 32 33  1  0      
 33 34  1  0      
 34 35  1  0      
 35 36  1  0      
 36 31  1  0      
 34 30  1  0      
 28 37  1  0      
 32 38  1  0      
 36 39  1  0      
 10  3  1  0      
 31 40  1  0      
 40 41  1  0      
 35 42  1  0      
 42 43  1  0      
M  STY  1   1 SUP
M  SLB  1   1   1
M  SAL   1  2  40  41
M  SBL   1  1  42
M  SMT   1 OMe
M  SBV   1 42   -8.7393    6.0118
M  STY  1   2 SUP
M  SLB  1   2   2
M  SAL   2  2  42  43
M  SBL   2  1  44
M  SMT   2 OMe
M  SBV   2 44   -6.6306    6.1422
M  END
$$$$
