# Supplementary material for: Bouillonamide: A Mixed Polyketide–Peptide Cytotoxin from the Marine Cyanobacterium Moorea bouillonii
Source: MDPI journal article supplement (doi:10.3390/md11083015), 2013-08-19
Supplement: s8 [file s8]

marinedrugs-11-03015-s004.mol
  ChemDraw04141416042D

 43 45  0  0  0  0  0  0  0  0999 V2000
    1.0717   -0.9694    0.0000 C   0  0  0  0  0  0  0  0  0  0  0  0
    1.0717   -1.7944    0.0000 C   0  0  0  0  0  0  0  0  0  0  0  0
    1.7862   -2.2069    0.0000 O   0  0  0  0  0  0  0  0  0  0  0  0
    2.5006   -0.9694    0.0000 O   0  0  0  0  0  0  0  0  0  0  0  0
    1.7862   -0.5569    0.0000 C   0  0  0  0  0  0  0  0  0  0  0  0
    3.2151   -2.2069    0.0000 C   0  0  0  0  0  0  0  0  0  0  0  0
    3.9296   -1.7944    0.0000 C   0  0  0  0  0  0  0  0  0  0  0  0
    3.9296   -0.9694    0.0000 C   0  0  0  0  0  0  0  0  0  0  0  0
    3.2151   -0.5569    0.0000 C   0  0  0  0  0  0  0  0  0  0  0  0
    1.7862   -3.0319    0.0000 C   0  0  0  0  0  0  0  0  0  0  0  0
    2.5006   -3.4444    0.0000 C   0  0  0  0  0  0  0  0  0  0  0  0
    3.2151   -3.0319    0.0000 C   0  0  0  0  0  0  0  0  0  0  0  0
    1.0717   -3.4444    0.0000 C   0  0  0  0  0  0  0  0  0  0  0  0
    0.3572   -3.0319    0.0000 C   0  0  0  0  0  0  0  0  0  0  0  0
   -0.3572   -3.4444    0.0000 C   0  0  0  0  0  0  0  0  0  0  0  0
   -1.0717   -3.0319    0.0000 C   0  0  0  0  0  0  0  0  0  0  0  0
   -1.7862   -3.4444    0.0000 C   0  0  0  0  0  0  0  0  0  0  0  0
   -2.5006   -3.0319    0.0000 C   0  0  0  0  0  0  0  0  0  0  0  0
   -3.2151   -3.4444    0.0000 C   0  0  0  0  0  0  0  0  0  0  0  0
   -3.9296   -3.0319    0.0000 C   0  0  0  0  0  0  0  0  0  0  0  0
    2.5006   -1.7944    0.0000 C   0  0  0  0  0  0  0  0  0  0  0  0
    3.9296   -3.4444    0.0000 O   0  0  0  0  0  0  0  0  0  0  0  0
    1.7862   -3.8569    0.0000 C   0  0  0  0  0  0  0  0  0  0  0  0
    0.2748   -2.0079    0.0000 O   0  0  0  0  0  0  0  0  0  0  0  0
    1.7862   -1.3819    0.0000 O   0  0  0  0  0  0  0  0  0  0  0  0
    3.2151   -1.3819    0.0000 H   0  0  0  0  0  0  0  0  0  0  0  0
    3.2151    0.2681    0.0000 C   0  0  0  0  0  0  0  0  0  0  0  0
    2.5006    0.6806    0.0000 C   0  0  0  0  0  0  0  0  0  0  0  0
    1.7862    0.2681    0.0000 C   0  0  0  0  0  0  0  0  0  0  0  0
    2.5081    1.3406    0.0000 O   0  0  0  0  0  0  0  0  0  0  0  0
    0.5148    2.6194    0.0000 C   0  0  0  0  0  0  0  0  0  0  0  0
    0.5148    1.7944    0.0000 C   0  0  0  0  0  0  0  0  0  0  0  0
    1.2293    1.3819    0.0000 O   0  0  0  0  0  0  0  0  0  0  0  0
    1.9438    1.7944    0.0000 C   0  0  0  0  0  0  0  0  0  0  0  0
    1.9438    2.6194    0.0000 C   0  0  0  0  0  0  0  0  0  0  0  0
    1.2293    3.0319    0.0000 C   0  0  0  0  0  0  0  0  0  0  0  0
    3.0840    1.2640    0.0000 H   0  0  0  0  0  0  0  0  0  0  0  0
   -0.1996    1.3819    0.0000 C   0  0  0  0  0  0  0  0  0  0  0  0
    1.2293    3.8569    0.0000 O   0  0  0  0  0  0  0  0  0  0  0  0
   -0.8802    2.9015    0.0000 O   0  0  0  0  0  0  0  0  0  0  0  0
   -1.2927    3.6160    0.0000 C   0  0  0  0  0  0  0  0  0  0  0  0
    2.6575    3.0319    0.0000 O   0  0  0  0  0  0  0  0  0  0  0  0
    3.3720    2.6194    0.0000 C   0  0  0  0  0  0  0  0  0  0  0  0
  1  2  1  0      
  2  3  1  0      
  4  5  1  0      
  5  1  1  0      
  6  7  1  0      
  7  8  1  0      
  8  9  1  0      
  9  4  1  0      
 10 11  1  0      
 11 12  1  0      
 12  6  1  0      
 10 13  1  0      
 13 14  1  0      
 14 15  1  0      
 15 16  2  0      
 16 17  1  0      
 17 18  2  0      
 18 19  1  0      
 19 20  1  0      
  6 21  1  6      
 12 22  1  1      
 10 23  1  6      
  2 24  2  0      
  5 25  1  1      
  9 26  1  1      
  9 27  1  0      
 27 28  1  0      
 28 29  1  0      
 29  5  1  0      
 28 30  1  0      
 31 32  1  0      
 32 33  1  0      
 33 34  1  0      
 34 35  1  0      
 35 36  1  0      
 36 31  1  0      
 34 30  1  6      
 28 37  1  1      
 32 38  1  1      
 36 39  1  1      
 10  3  1  1      
 31 40  1  6      
 40 41  1  0      
 35 42  1  1      
 42 43  1  0      
M  STY  1   1 SUP
M  SLB  1   1   1
M  SAL   1  2  40  41
M  SBL   1  1  42
M  SMT   1 OMe
M  SBV   1 42   -8.7393    6.0118
M  STY  1   2 SUP
M  SLB  1   2   2
M  SAL   2  2  42  43
M  SBL   2  1  44
M  SMT   2 OMe
M  SBV   2 44   -6.6306    6.1422
M  END
